# Supplementary material for: Characterization of Neoagarooligosaccharide Hydrolase BpGH117 from a Human Gut Bacterium Bacteroides plebeius
Source: MDPI journal article supplement (doi:10.3390/md19050271), 2021-05-13
Supplement: s1 [file s1]

## Supplementary Materials

### Characterization of neoagarooligosaccharide hydrolase *BpGH117* from a human gut bacterium *Bacteroides plebeius*

Yerin Jin<sup>†</sup>, Sora Yu<sup>†</sup>, Dong Hyun Kim, Eun Ju Yun, and Kyoung Heon Kim<sup>\*</sup>

Department of Biotechnology, Graduate School, Korea University, Seoul 02841, South Korea

<sup>\*</sup>Correspondence: khekim@korea.ac.kr

<sup>†</sup>These authors contributed equally to this work.

To obtain the kinetic parameters of *BpGH117*, the enzymatic reactions were performed using different concentrations of neoagarobiose (NeoDP2) ranging from 0.5 to 4 mg/ml in the total reaction mixture volume 1 ml containing 0.05 mg/ml *BpGH117* at a pH of 9.0 and 35°C for 10 min. The values of  $K_m$  and  $V_{max}$  were calculated from the Lineweaver-Burk plot. One unit (U) of *BpGH117* activity was defined as the amount of enzyme required to release 1  $\mu$ mol of reducing sugar per min, in which reducing sugar was quantified by the dinitrosalicylic acid method using galactose as the sugar standard.

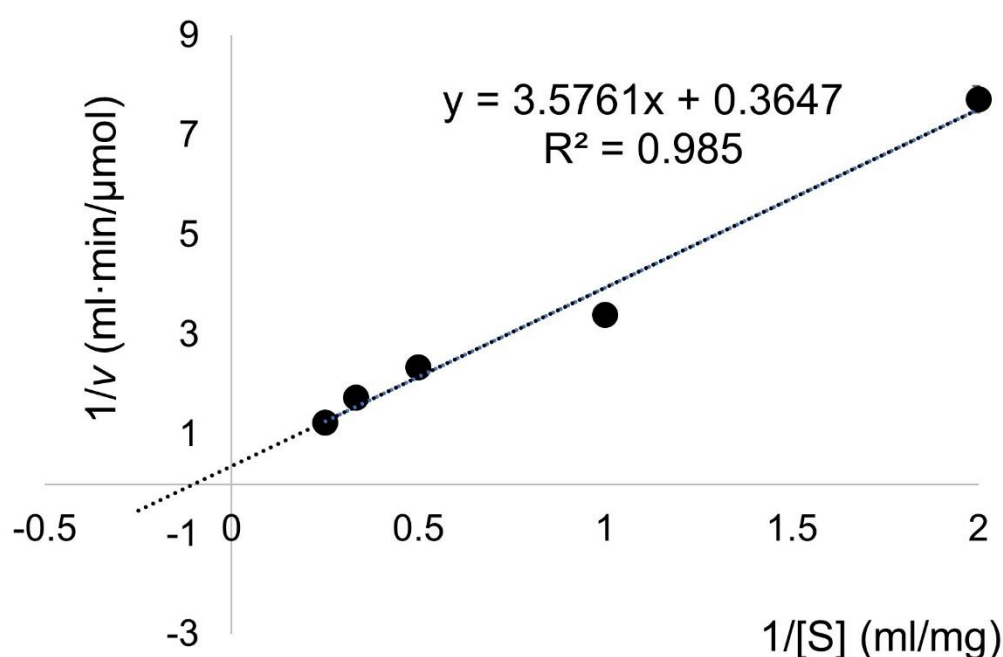

**Figure S1** Lineweaver-Burk plot of *BpGH117*

To determine the kinetic parameters, initial velocity experiments were performed, and the Michaelis-Menten equation (S1.1) was used. From the experiment, the product

S2

concentrations were plotted against time to determine the initial velocity ( $v$ ) with various initial substrate concentrations at the fixed initial concentration of *BpGH117* (i.e.,  $[E_0] = 0.05$  mg/ml).

$$v = \frac{d[P]}{dt} = \frac{-d[S]}{dt} = k_{cat} \quad (S1.1)$$

$$v = \frac{V_{max}[S]}{K_m + [S]} \quad (S1.1a)$$

$$\frac{1}{v} = \frac{-1}{V_{max}} + \frac{K_m}{V_{max}} \frac{1}{[S]} \quad (S1.1b)$$

Using the initial velocities and the initial substrate concentrations, the Lineweaver-Burk plot was obtained (Fig. S1). A plot of  $1/v$  versus  $1/[S]$  yielded a straight line with a slope,  $K_m/V_{max}$  and a y-axis intercept,  $1/V_{max}$ . In the Lineweaver-Burk plot, when  $y$  was 0,  $x$  was  $-1/K_m$ .

$$V_{max} = k_{cat}[E_0] \quad (S1.2)$$

The  $K_m$  and  $V_{max}$  values of *BpGH117* on NeoDP2 as the substrate were 9.8 mg/ml and 2.7  $\mu\text{mol}/(\text{ml}/\text{min})$ , respectively. From the definition of U of *BpGH117*, 2.7  $\mu\text{mol}/(\text{ml}/\text{min}) = 2.7$  U/ml. To alternatively express  $V_{max}$  in U/mg protein, 2.7 U/ml of  $V_{max}$  was divided by 0.05 mg/ml, and  $V_{max}$  was expressed as 54.84 U/mg protein.

To determine  $k_{cat}$ , the turnover number, Equation S1.2 was used. The molar

mass of recombinant His-tagged *BpGH117* in monomeric form is 44.5 kDa, but the *BpGH117* can function only in dimeric form as the minimal unit of the functioning enzyme. Therefore, in determining  $k_{cat}$ , 1  $\mu\text{mol}$  of *BpGH117* was considered ( $2 \times 44.5 \text{ kDa} \times 10^{-6} \text{ mol} = 89.0 \text{ mg}$ , and the initial enzyme concentration,  $[E_0]$ , was  $0.05 \text{ mg/ml} = 5.62 \times 10^{-4} \mu\text{mol/ml}$ . The value of  $k_{cat}$  was calculated to be  $80.1 \text{ s}^{-1}$  as shown in Equation S1.3.

$$k_{cat} = \frac{2.7 \mu\text{mol}/(\text{ml}/\text{min})}{5.62 \times 10^{-4} \mu\text{mol/ml}} \times \frac{\text{min}}{60 \text{ s}} = 80.1 \text{ s}^{-1} \quad (\text{S1.3})$$

Finally, using the values of  $k_{cat}$  and  $K_m$ , the catalytic efficiency of *BpGH117*,  $k_{cat}/K_m$ , was estimated to be  $8.17 \text{ s}^{-1}/(\text{mg/ml})$ . Since the MW of NeoDP2 is 324.28,  $k_{cat}/K_m$  was also expressed as  $2.65 \text{ s}^{-1}/\text{mM}$ .
